# Supplementary material for: RNA circularization strategies in vivo and in vitro
Source: PubMed Central journal article supplement (PMC4344496; doi:10.1093/nar/gkv045), 2015-02-06
Supplement: supp_gkv045_nar-00828-survey-d-2014-File008.pdf [file supp_gkv045_nar-00828-survey-d-2014-File008.pdf]

# Supplementary Data

## **RNA circularization strategies *in vivo* and *in vitro***

Sonja Petkovic and Sabine Müller

**This PDF file includes:**

Supplementary Protocols S1 to S13

p2-p7

References

p8

# Protocols

## **S1: RNA lariat production using cyanogen bromide**

|                      |                                          |
|----------------------|------------------------------------------|
| Nicked branched RNAs | Each 100 $\mu$ M                         |
| DNA templates        | Each 100 $\mu$ M                         |
| MES                  | 0.25 M                                   |
| MgCl <sub>2</sub>    | 20 mM                                    |
| BrCN                 | 1:10 vol of BrCN; 5 M CH <sub>3</sub> CN |

RNAs and DNAs were solved in MES. After addition of MgCl<sub>2</sub>, samples were denatured at 95 °C for 10 min, slowly cooled down to room temperature, and then left at 4 °C overnight. The mixture was hold on ice for 15 min, then BrCN was added and the following reaction took place on ice within 15 min. Ligation was stopped by precipitation with 1 ml 2% LiClO<sub>4</sub> in acetone (1).

---

## **S2: Chemical circularization of RNAs with deoxyuridine at the 3'-end**

|                         |                                  |
|-------------------------|----------------------------------|
| pre-circRNA             | 50 $\mu$ M                       |
| aligning DNA            | 55 $\mu$ M                       |
| Imidazol-HCl (pH = 7.0) | 200 mM                           |
| NiCl <sub>2</sub>       | 100 mM                           |
| BrCN (solid)            | to final concentration of 125 mM |

Circularization was conducted for 12 h (2).

---

### **S3: Circularization of *in vitro* transcribed single stranded RNA**

a) Dephosphorylation:

|                              |                |
|------------------------------|----------------|
| 5'-triphosphate carrying RNA | 100 ng         |
| Tris-HCl                     | 10 mM (pH 8.3) |
| MgCl <sub>2</sub>            | 1 mM           |
| ZnCl <sub>2</sub>            | 1 mM           |
| calf intestinal phosphatase  | 1 unit         |

Reaction took place at 37°C for 30 min, and was stopped by phenol extraction followed by ethanol precipitation.

b) Kinase reaction:

|                       |                |
|-----------------------|----------------|
| dephosphorylated RNA  | 20 µl          |
| Tris-HCl              | 50 mM (pH 7.6) |
| MgCl <sub>2</sub>     | 10 mM          |
| ATP                   | 100 µM         |
| DTT                   | 10 mM          |
| polynucleotide kinase | 5 units        |

Reaction proceeded at 37 °C for 30 min, and was stopped by heating to 65°C for 10 min.

c) Circularization:

|                   |                |
|-------------------|----------------|
| RNA               | 2-3 µg/ml      |
| Hepes             | 50 mM (pH 8.3) |
| MgCl <sub>2</sub> | 10 mM          |
| ATP               | 1 mM           |
| DTT               | 10 mM          |
| DMSO              | 10%            |
| T4 RNA ligase 1   | 100units/ml    |

Circularization took place at 12 °C over 4 h (3).

---

#### **S4: Circularization of branched single-stranded RNA with T4 RNA ligase 1:**

|                                   |                  |
|-----------------------------------|------------------|
| 5'-phosphorylated RNA             | 1 $\mu$ M        |
| HEPES                             | 3,75 mM (pH=7.5) |
| NaCl                              | 15 mM            |
| EDTA                              | 0.1 mM           |
| + HEPES to final concentration of | 5 mM             |
| ATP                               | 50 $\mu$ M       |
| MgCl <sub>2</sub>                 | 10 mM            |
| DTT                               | 10 mM            |
| T4 RNA ligase 1                   | 1 U/ $\mu$ L     |

RNA, HEPES, NaCl and EDTA was incubated and boiled at 95 °C for 3 min, followed by chilling on ice for 5 min. HEPES concentration was increased to 5 mM and ATP, MgCl<sub>2</sub>, DTT and ligase were added as stated. Circularization was conducted at 37 °C for 30 min and stopped using 80 % formamide in 1x TBE, 50 mM EDTA and 0.025% each bromphenol blue and xylene cyanol (4).

---

#### **S5: Splinted RNA ligation using T4 DNA ligase**

Plasmid DNAs were linearized with SmaI, followed by GMP primed *in vitro* transcription with T7 RNA polymerase [10:1 ratio of GMP to GTP]. RNA transcripts and DNA splint were mixed together and denaturated at 90 °C. Annealing took place by slow cooling to room temperature in a solution containing the following components within 60 min:

|                  |                         |
|------------------|-------------------------|
| Tris-HCl, pH 7.5 | 10 mM                   |
| NaCl             | 100 mM                  |
| EDTA             | 0.1 mM                  |
| ATP              | 5 $\mu$ M               |
| T4 DNA ligase    | 100 units/ng transcript |

Ligation buffer and T4 DNA ligase were added. Circularization proceeded at room temperature for 8 to 16 hours (5).

#### **S6: One of the first circularization assays with T4 RNA Ligase 1**

|                                     |                                                 |
|-------------------------------------|-------------------------------------------------|
| Tris-HCl, pH 7.5                    | 50 mM                                           |
| MgCl <sub>2</sub>                   | 10 mM                                           |
| bovine serum albumine               | 20 $\mu$ g/ $\mu$ l                             |
| ATP                                 | 0.1 mM                                          |
| RNA [5'- <sup>32</sup> P]-oligo(pA) | 10 <sup>8</sup> -10 <sup>9</sup> cpm/ $\mu$ mol |
| T4 RNA ligase 1                     | 0.005-0.02 U                                    |

Total reaction volume was 25  $\mu$ l and circularization took place at 37 °C for 30 min. The mixture was then boiled for 2 min (6).

---

**S7: RNA circularization with T4 RNA Ligase 1:**

|                                                                            |              |
|----------------------------------------------------------------------------|--------------|
| RNA [5'- <sup>32</sup> P]- polyA (0.2 nmol of 5'- <sup>32</sup> P-termini) | 7 nmol       |
| Tris-HCl, pH 7.5                                                           | 5 μM         |
| MgCl <sub>2</sub>                                                          | 1 μM         |
| Albumin                                                                    | 5 μg         |
| ATP                                                                        | 10 nmol      |
| DTT                                                                        | 0.13 μmol    |
| T4 RNA ligase 1                                                            | 0.005-0.02 U |

Total reaction volume was 100 μl and circularization took place at 38 °C for 30 min. Reaction was stopped by boiling for 2 min (6).

---

**S8: Circularization of single-stranded oligo- or oligodeoxyribonucleotides with T4 RNA ligase 1:**

|                                      |           |
|--------------------------------------|-----------|
| RNA or DNA with 3'-hydroxyl terminus | 6 pmol    |
| Tris-HCl, pH 7.8                     | 50 mM     |
| MgCl <sub>2</sub>                    | 10 mM     |
| DTT                                  | 10 mM     |
| ATP                                  | 1 mM      |
| hexamine cobalt chloride             | 1 mM      |
| PEG 8000                             | 25% (w/v) |
| T4 RNA ligase 1                      | 20 U      |

Reaction was carried out for 16 hr at 22 °C in a total reaction volume of 10 μl and stopped by addition of 40 μl of 10 mM Tris-HCl, pH 8.0; 2.5 mM EDTA (7).

---

**S9: Circularization of linear hammerhead ribozymes with T4 RNA ligase 1**

|                   |              |
|-------------------|--------------|
| RNA               | 0.03-100 μM  |
| Helper DNA        | 0.036-120 μM |
| MgCl <sub>2</sub> | 10 mM        |
| T4 RNA ligase 1   | 0.7 units/μL |

RNA mixed with MgCl<sub>2</sub> was denatured (90 °C, 3 min) and incubated in T4 RNA ligase buffer at 16 °C for at least 1 h, before addition of T4 RNA ligase. Reaction was left to proceed at 16 °C overnight (8).

---

**S10: Double-circularization of dumbbell shaped RNA with RNA ligase 1**

|                            |                         |
|----------------------------|-------------------------|
| 5'-phosphorylated RNA      | 2 $\mu$ M               |
| ATP                        | 1 mM                    |
| PEG 6000                   | 25%                     |
| bovine serum albumin (BSA) | 0.006%                  |
| Tris-HCl                   | 50 mM (pH 7.5)          |
| MgCl <sub>2</sub>          | 10 mM                   |
| DTT                        | 10 mM                   |
| T4 RNA ligase 1            | 0.05-0.4 units/ $\mu$ L |

Reaction took place at room temperature overnight (9).

---

**S11: Ligation of a nick in a double-stranded substrate with T4 RNA ligase 2:**

|                                                  |               |
|--------------------------------------------------|---------------|
| dsRNA nicks with adjacent 3'-OH and 5'-p termini | 10 to 20 pmol |
| Tris-HCl, pH 7.5                                 | 50 mM         |
| MgCl <sub>2</sub>                                | 2 mM          |
| DTT                                              | 1 mM          |
| ATP                                              | 400 $\mu$ M   |
| T4 RNA ligase 2                                  | 1 U           |

Total reaction volume was 20  $\mu$ l. Reaction proceeded for 30 min at 37 °C and was stopped by adding 2  $\mu$ l of 0.5 M EDTA. (10)

---

**S12: Exemplary protocol of RNA circularization using Pap1020:**

|                       |           |
|-----------------------|-----------|
| labeled RNA substrate | 1 pmol    |
| Tris-HCl, pH 6.5      | 50 mM     |
| MgCl <sub>2</sub>     | 5 mM      |
| DTT                   | 5 mM      |
| ATP                   | 5 $\mu$ M |
| Pap1020               | 2 pmol U  |

Incubate at 75 °C for 30 min (11).

---

**S13: Exemplary protocol of RNA circularization with RtcB in a 10 µl reaction:**

|                   |         |
|-------------------|---------|
| RNA substrate     | 0.1 µM  |
| Tris-HCl, pH 8.0  | 50 mM   |
| MnCl <sub>2</sub> | 2 mM    |
| GTP               | 6.25 µM |
| Pap1020           | 1 µM    |

Incubation at 37 °C for 30 min. Reaction was stopped using 10 µl 90% (vol/vol) formamide and 50 mM EDTA (12)

---

## References

1. Carriero, S. and Damha, M.J. (2003) Template-mediated synthesis of lariat RNA and DNA. *J Org Chem*, **68**, 8328-8338.
2. Wang, S. and Kool, E.T. (1994) Circular RNA oligonucleotides. Synthesis, nucleic acid binding properties, and a comparison with circular DNAs. *Nucleic Acids Res*, **22**, 2326-2333.
3. Rezaian, M.A. (1999) Synthesis of infectious viroids and other circular RNAs. *Curr Issues Mol Biol*, **1**, 13-20.
4. Wang, Y. and Silverman, S.K. (2006) A general two-step strategy to synthesize lariat RNAs. *RNA*, **12**, 313-321.
5. Chen, C.Y. and Sarnow, P. (1995) Initiation of protein synthesis by the eukaryotic translational apparatus on circular RNAs. *Science*, **268**, 415-417.
6. Kaufmann, G., Klein, T. and Littauer, U.Z. (1974) T4 RNA ligase: substrate chain length requirements. *FEBS Lett*, **46**, 271-275.
7. Nichols, N.M., Tabor, S. and McReynolds, L.A. (2008) RNA ligases. *Curr Protoc Mol Biol*, **Chapter 3**, Unit3 15.
8. Wang, L. and Ruffner, D.E. (1998) Oligoribonucleotide circularization by 'template-mediated' ligation with T4 RNA ligase: synthesis of circular hammerhead ribozymes. *Nucleic Acids Res*, **26**, 2502-2504.
9. Abe, N., Abe, H., Nagai, C., Harada, M., Hatakeyama, H., Harashima, H., Ohshiro, T., Nishihara, M., Furukawa, K., Maeda, M. *et al.* (2011) Synthesis, structure, and biological activity of dumbbell-shaped nanocircular RNAs for RNA interference. *Bioconjug Chem*, **22**, 2082-2092.
10. Nandakumar, J., Ho, C.K., Lima, C.D. and Shuman, S. (2004) RNA substrate specificity and structure-guided mutational analysis of bacteriophage T4 RNA ligase 2. *J Biol Chem*, **279**, 31337-31347.
11. Brooks, M.A., Meslet-Cladiere, L., Graille, M., Kuhn, J., Blondeau, K., Myllykallio, H. and van Tilbeurgh, H. (2008) The structure of an archaeal homodimeric ligase which has RNA circularization activity. *Protein Sci*, **17**, 1336-1345.
12. Chakravarty, A.K., Subbotin, R., Chait, B.T. and Shuman, S. (2012) RNA ligase RtcB splices 3'-phosphate and 5'-OH ends via covalent RtcB-(histidinyI)-GMP and polynucleotide-(3')pp(5')G intermediates. *Proc Natl Acad Sci U S A*, **109**, 6072-6077.
